# Supplementary material for: Spatial and temporal variability in the ice-nucleating ability of alpine snowmelt and extension to frozen cloud fraction
Source: Copernicus journal article supplement (doi:10.5194/acp-20-163-2020), 2020-01-06
Supplement: Supplementary file 1 [file acp-20-163-2020-supplement.pdf]

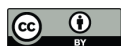

*Supplement of*

## **Spatial and temporal variability in the ice-nucleating ability of alpine snowmelt and extension to frozen cloud fraction**

**Killian P. Brennan et al.**

*Correspondence to:* Nadine Borduas-Dedekind ([nadine.borduas@usys.ethz.ch](mailto:nadine.borduas@usys.ethz.ch))

The copyright of individual parts of the supplement might differ from the CC BY 4.0 License.

Table of Contents

1. Snow sample collection procedure.....2

2. Recorded snow sampling parameters.....3

3. Techno Plastic Products tube washing comparison .....6

5 4. Immersion freezing experiments with DRINCZ .....6

5. Frozen fraction and INP concentration analysis .....7

6. Size determination.....9

7. Engstligenalp map .....10

8. Site images.....10

10 9. References .....12

1. Snow sample collection procedure

- a) A sampling site was chosen to have as little human disturbances as possible (e.g. footprints, ski tracks etc.).
- 15 b) The person sampling wore powder free nitrile gloves (PZN-3778303, Sempermed, USA).
- c) The snow was scooped directly with the open tube, to avoid contaminating the sample with hands or spatulas. If the snow was fresh, loose powder, it was necessary to compress the snow within the tube and sample multiple times to obtain a large enough sampling volume (optimal 30 mL). This compression was accomplished by repeatedly scooping snow and banging the bottom of the tube against a firm surface (for example ski boot).
- 20 d) The cap was tightly screwed back on to the tube.
- e) The sampling site was documented through photography, to record the surrounding snow conditions. The identification number on the tube was also photographed to relate the sample to its sampling location and sampling time.
- f) The coordinates of the site were determined via GPS and recorded.
- g) The samples were placed in a freezer as soon as possible. If no freezer was readily available (for a longer, multi-day trips)
- 25 the samples were stored outside in sub-freezing conditions. During transportation, insulating clothing (for example a down garment) was wrapped around the samples to prevent melting.
- h) For long-term storage, the samples were placed in a freezer at -20 °C and analysed within 14 days.

## 2. Recorded snow sampling parameters

**Table S1 Overview of all snow sample data. Missing ID's correspond to prepared but unused sampling tubes, the date represents the day of sampling, latitude and longitude with an accuracy of 100 m, elevation of sampling site, site name extracted from map, snow age for surface samples, sampling depths for depth profiles, total organic carbon (TOC), conductivity and  $T_{50}$ .**

| ID | Date     | lat [°N] | lon [°E] | Elevation<br>[m a.s.l.] | Site Name     | Snow<br>age [d] | Depth<br>[m] | TOC<br>[mg L <sup>-1</sup> ] | Conductivity<br>[μS cm <sup>-1</sup> ] | T <sub>50</sub> |
|----|----------|----------|----------|-------------------------|---------------|-----------------|--------------|------------------------------|----------------------------------------|-----------------|
| 1  | 04.02.18 | 46.679   | 7.400    | 1715                    | Schibe        | 1               | 0            | 0.39                         | 7                                      | -6.5            |
| 2  | 04.02.18 | 46.674   | 7.394    | 2033                    | Schibe        | 1               | 0            | 0.39                         | 7                                      | -5.8            |
| 3  | 13.02.18 | 46.533   | 7.473    | 2053                    | Rauflihore    | 1               | 0            | 0.35                         | 5                                      | -10.4           |
| 4  | 13.02.18 | 46.532   | 7.483    | 2316                    | Rauflihore    | 1               | 0            | 0.30                         | 5                                      | -12.3           |
| 6  | 24.02.18 | 47.044   | 9.112    | 2294                    | Schilt        | 3               | 0            | 0.30                         | 2                                      | -9.6            |
| 7  | 24.02.18 | 47.046   | 9.115    | 2242                    | Schilt        | 3               | 0            | 0.40                         | 6                                      | -19.0           |
| 8  | 24.02.18 | 47.046   | 9.115    | 2242                    | Schilt        | 3               | 0            | 0.33                         | 4                                      | -15.3           |
| 9  | 24.02.18 | 47.046   | 9.115    | 2242                    | Schilt        | 3               | 0            | 0.31                         | 4                                      | -14.8           |
| 10 | 01.03.18 | 47.415   | 8.541    | 440                     | Wahlenpark    | 0               | 0            | 2.14                         | 10                                     | -15.8           |
| 16 | 02.03.18 | 47.416   | 8.541    | 440                     | Wahlenpark    | 0               | 0            | 1.94                         | 8                                      | -16.7           |
| 17 | 04.03.18 | 46.591   | 7.482    | 1945                    | Meniggrat     | 1               | 0            |                              | 3                                      | -8.2            |
| 21 | 17.03.18 | 46.554   | 7.457    | 1625                    | Alpetli       | 0               | 0            | 0.67                         | 4                                      | -21.6           |
| 22 | 17.03.18 | 46.554   | 7.457    | 1625                    | Alpetli       |                 | 0.2          | 0.62                         | 3                                      | -7.2            |
| 23 | 17.03.18 | 46.554   | 7.457    | 1625                    | Alpetli       |                 | 0.4          | 0.60                         | 4                                      | -14.4           |
| 24 | 17.03.18 | 46.554   | 7.457    | 1625                    | Alpetli       |                 | 0.6          | 0.57                         | 3                                      | -20.3           |
| 25 | 17.03.18 | 46.554   | 7.457    | 1625                    | Alpetli       |                 | 0.8          | 1.33                         | 2                                      | -6.7            |
| 26 | 17.03.18 | 46.554   | 7.457    | 1625                    | Alpetli       |                 | 1            | 0.58                         | 3                                      | -5.3            |
| 27 | 17.03.18 | 46.554   | 7.457    | 1625                    | Alpetli       |                 | 1.2          | 0.65                         | 3                                      | -6.5            |
| 28 | 17.03.18 | 46.554   | 7.457    | 1625                    | Alpetli       |                 | 1.4          | 0.64                         | 3                                      | -5.9            |
| 31 | 14.04.18 | 46.439   | 7.566    | 1954                    | Engstligenalp | 9               | 0            | 0.81                         | 6                                      | -6.9            |
| 32 | 14.04.18 | 46.434   | 7.556    | 1967                    | Engstligenalp | 9               | 0            | 0.70                         | 3                                      | -5.7            |
| 33 | 14.04.18 | 46.429   | 7.545    | 2185                    | Grossstrubel  | 9               | 0            | 0.58                         | 3                                      | -12.1           |
| 34 | 14.04.18 | 46.426   | 7.543    | 2385                    | Grossstrubel  | 9               | 0            | 0.60                         | 4                                      | -5.8            |
| 35 | 14.04.18 | 46.421   | 7.549    | 2638                    | Grossstrubel  | 9               | 0            | 5.17                         | 3                                      | -9.5            |
| 36 | 14.04.18 | 46.418   | 7.551    | 2874                    | Grossstrubel  | 9               | 0            | 0.86                         | 4                                      | -13.4           |
| 37 | 14.04.18 | 46.414   | 7.554    | 3091                    | Grossstrubel  | 9               | 0            | 0.60                         | 3                                      | -11.7           |
| 38 | 14.04.18 | 46.414   | 7.557    | 3153                    | Grossstrubel  | 9               | 0            | 0.76                         | 4                                      | -7.4            |
| 39 | 14.04.18 | 46.413   | 7.562    | 3222                    | Grossstrubel  | 9               | 0            | 0.97                         | 7                                      | -9.3            |
| 41 | 14.04.18 | 46.435   | 7.562    | 1983                    | Engstligenalp |                 | 1.4          | 0.54                         | 2                                      | -17.3           |
| 42 | 14.04.18 | 46.435   | 7.562    | 1983                    | Engstligenalp |                 | 1.3          | 0.59                         | 6                                      | -14.0           |

| ID | Date     | lat [°N] | lon [°E] | Elevation<br>[m a.s.l.] | Site Name     | Snow<br>age [d] | Depth<br>[m] | TOC<br>[mg L <sup>-1</sup> ] | Conductivity<br>[μS cm <sup>-1</sup> ] | T <sub>50</sub> |
|----|----------|----------|----------|-------------------------|---------------|-----------------|--------------|------------------------------|----------------------------------------|-----------------|
| 43 | 14.04.18 | 46.435   | 7.562    | 1983                    | Engstligenalp |                 | 1.2          | 0.69                         | 3                                      | -16.8           |
| 44 | 14.04.18 | 46.435   | 7.562    | 1983                    | Engstligenalp |                 | 1.1          | 0.42                         | 2                                      | -17.1           |
| 45 | 14.04.18 | 46.435   | 7.562    | 1983                    | Engstligenalp |                 | 1            | 0.56                         | 3                                      | -14.2           |
| 46 | 14.04.18 | 46.435   | 7.562    | 1983                    | Engstligenalp |                 | 0.9          | 0.61                         | 6                                      | -9.0            |
| 47 | 14.04.18 | 46.435   | 7.562    | 1983                    | Engstligenalp |                 | 0.8          | 0.63                         | 7                                      | -15.0           |
| 48 | 14.04.18 | 46.435   | 7.562    | 1983                    | Engstligenalp |                 | 0.7          | 0.84                         | 9                                      | -13.8           |
| 49 | 14.04.18 | 46.435   | 7.562    | 1983                    | Engstligenalp |                 | 0.6          | 0.41                         | 2                                      | -17.9           |
| 51 | 14.04.18 | 46.435   | 7.562    | 1983                    | Engstligenalp |                 | 0.5          | 0.49                         | 2                                      | -16.4           |
| 52 | 14.04.18 | 46.435   | 7.562    | 1983                    | Engstligenalp |                 | 0.4          | 0.34                         | 2                                      | -18.3           |
| 53 | 14.04.18 | 46.435   | 7.562    | 1983                    | Engstligenalp |                 | 0.3          | 0.57                         | 3                                      | -14.2           |
| 54 | 14.04.18 | 46.435   | 7.562    | 1983                    | Engstligenalp |                 | 0.2          | 0.47                         | 3                                      | -14.9           |
| 55 | 14.04.18 | 46.435   | 7.562    | 1983                    | Engstligenalp |                 | 0.1          | 0.45                         | 3                                      | -14.5           |
| 56 | 14.04.18 | 46.435   | 7.562    | 1983                    | Engstligenalp | 9               | 0            | 0.63                         | 3                                      | -7.7            |
| 57 | 14.04.18 | 46.435   | 7.562    | 1983                    | Engstligenalp | 9               | 0            | 0.67                         | 4                                      | -9.1            |
| 58 | 14.04.18 | 46.435   | 7.562    | 1983                    | Engstligenalp | 9               | 0            | 0.57                         | 3                                      | -6.7            |
| 59 | 14.04.18 | 46.435   | 7.562    | 1983                    | Engstligenalp | 9               | 0            | 0.53                         | 3                                      | -10.7           |
| 61 | 02.04.18 | 46.542   | 7.467    | 2045                    | Chalberhöri   | 1               | 0            | 0.72                         | 3                                      | -9.3            |
| 62 | 02.04.18 | 46.542   | 7.467    | 2045                    | Chalberhöri   |                 | 0.3          | 0.59                         | 2                                      | -21.6           |
| 63 | 02.04.18 | 46.542   | 7.467    | 2045                    | Chalberhöri   |                 | 0.7          | 0.49                         | 2                                      | -17.1           |
| 64 | 02.04.18 | 46.542   | 7.467    | 2045                    | Chalberhöri   |                 | 1            | 0.47                         | 4                                      | -16.8           |
| 65 | 02.04.18 | 46.542   | 7.467    | 2045                    | Chalberhöri   |                 | 1.2          | 0.45                         | 2                                      | -13.0           |
| 66 | 02.04.18 | 46.542   | 7.467    | 2045                    | Chalberhöri   |                 | 1.5          | 0.76                         | 3                                      | -7.0            |
| 67 | 02.04.18 | 46.542   | 7.467    | 2045                    | Chalberhöri   |                 | 1.8          | 0.46                         | 2                                      | -10.3           |
| 68 | 02.04.18 | 46.542   | 7.467    | 2045                    | Chalberhöri   |                 | 2.1          | 0.41                         | 3                                      | -11.0           |
| 69 | 02.04.18 | 46.542   | 7.467    | 2045                    | Chalberhöri   |                 | 2.4          | 0.65                         | 3                                      | -13.5           |
| 71 | 15.04.18 | 46.835   | 9.795    | 2822                    | Weissfluh     | 3               | 0            | 0.83                         | 4                                      | -6.8            |
| 72 | 15.04.18 | 46.835   | 9.795    | 2822                    | Weissfluh     | 3               | 0            | 0.86                         | 3                                      | -13.9           |
| 73 | 15.04.18 | 46.835   | 9.795    | 2822                    | Weissfluh     | 3               | 0            | 1.15                         | 10                                     | -7.1            |
| 74 | 15.04.18 | 46.835   | 9.795    | 2822                    | Weissfluh     | 3               | 0            | 0.45                         | 2                                      | -14.4           |
| 75 | 15.04.18 | 46.835   | 9.795    | 2822                    | Weissfluh     | 3               | 0            | 1.30                         | 3                                      | -10.5           |
| 76 | 15.04.18 | 46.835   | 9.795    | 2822                    | Weissfluh     | 3               | 0            | 0.67                         | 2                                      | -16.7           |
| 77 | 15.04.18 | 46.835   | 9.795    | 2822                    | Weissfluh     | 3               | 0            | 0.84                         | 3                                      | -16.0           |
| 78 | 15.04.18 | 46.835   | 9.795    | 2822                    | Weissfluh     | 3               | 0            | 0.96                         | 3                                      | -16.4           |
| 79 | 15.04.18 | 46.835   | 9.795    | 2822                    | Weissfluh     | 3               | 0            | 1.03                         | 3                                      | -16.1           |

| ID  | Date     | lat [°N] | lon [°E] | Elevation<br>[m a.s.l.] | Site Name         | Snow<br>age [d] | Depth<br>[m] | TOC<br>[mg L <sup>-1</sup> ] | Conductivity<br>[μS cm <sup>-1</sup> ] | T <sub>50</sub> |
|-----|----------|----------|----------|-------------------------|-------------------|-----------------|--------------|------------------------------|----------------------------------------|-----------------|
| 83  | 22.04.18 | 46.169   | 7.992    | 3530                    | Fletschhorn       | 10              | 0            | 0.82                         |                                        | -12.9           |
| 84  | 22.04.18 | 46.166   | 7.987    | 3227                    | Fletschhorn       | 10              | 0            | 0.94                         | 5                                      | -12.3           |
| 88  | 22.04.18 | 46.168   | 8.003    | 3981                    | Fletschhorn       | 10              | 0            | 0.64                         | 14                                     | -16.2           |
| 93  | 12.05.18 | 45.945   | 6.967    | 3137                    | Pte Aig.<br>Verte | 1               | 0            | 3.32                         |                                        | -9.5            |
| 96  | 12.05.18 | 45.944   | 6.962    | 3388                    | Pte Aig.<br>Verte | 1               | 0            | 1.22                         | 13                                     | -13.1           |
| 97  | 12.05.18 | 45.945   | 6.967    | 3137                    | Pte Aig.<br>Verte | 1               | 0            | 3.31                         | 8                                      | -10.5           |
| 98  | 25.04.18 | 46.980   | 8.257    | 2020                    | Pilatus           | 9               | 0            | 1.02                         | 6                                      | -7.8            |
| 99  | 25.04.18 | 46.980   | 8.257    | 2020                    | Pilatus           | 9               | 0            | 0.77                         | 4                                      | -6.2            |
| 101 | 21.05.18 | 47.007   | 9.014    | 2772                    | Vrenelisgärtli    | 2               | 0            | 1.87                         | 6                                      | -11.4           |
| 102 | 19.04.18 | 47.252   | 9.341    | 2416                    | Säntis            | 4               | 0            | 0.47                         | 2                                      | -15.3           |
| 103 | 19.04.18 | 47.252   | 9.342    | 2416                    | Säntis            | 4               | 0            | 0.55                         | 2                                      | -11.4           |
| 104 | 12.05.18 | 45.944   | 6.962    | 3388                    | Pte Aig.<br>Verte | 1               | 0            | 3.16                         |                                        | -12.3           |
| 105 | 19.04.18 | 47.252   | 9.342    | 2416                    | Säntis            | 4               | 0            | 0.60                         | 2                                      | -12.7           |
| 106 | 21.05.18 | 47.007   | 9.014    | 2772                    | Vrenelisgärtli    | 2               | 0            |                              | 8                                      | -11.6           |
| 107 | 21.05.18 | 47.007   | 9.014    | 2772                    | Vrenelisgärtli    | 2               | 0            | 1.33                         | 7                                      | -12.6           |
| 108 | 19.04.18 | 47.252   | 9.342    | 2416                    | Säntis            | 4               | 0            | 0.60                         | 3                                      | -15.1           |
| 109 | 21.05.18 | 47.007   | 9.014    | 2772                    | Vrenelisgärtli    | 2               | 0            | 1.19                         | 6                                      | -11.8           |
| 111 | 22.04.18 | 46.598   | 8.604    | 2729                    | Sankt<br>Annafirn | 11              | 0            | 0.92                         | 2                                      | -13.5           |
| 112 | 22.04.18 | 46.598   | 8.604    | 2729                    | Sankt<br>Annafirn | 11              | 0            | 0.87                         | 2                                      | -13.8           |
| 113 | 22.04.18 | 46.598   | 8.604    | 2729                    | Sankt<br>Annafirn | 11              | 0            | 0.84                         | 2                                      | -12.5           |
| 114 | 22.04.18 | 46.598   | 8.604    | 2729                    | Sankt<br>Annafirn | 11              | 0            | 1.49                         | 2                                      | -12.8           |
| 116 | 22.04.18 | 46.598   | 8.604    | 2729                    | Sankt<br>Annafirn | 11              | 0            | 0.89                         | 2                                      | -14.5           |
| 119 | 22.04.18 | 46.598   | 8.604    | 2729                    | Sankt<br>Annafirn | 11              | 0            | 1.03                         | 2                                      | -13.6           |

### 3. Techno Plastic Products tube washing comparison

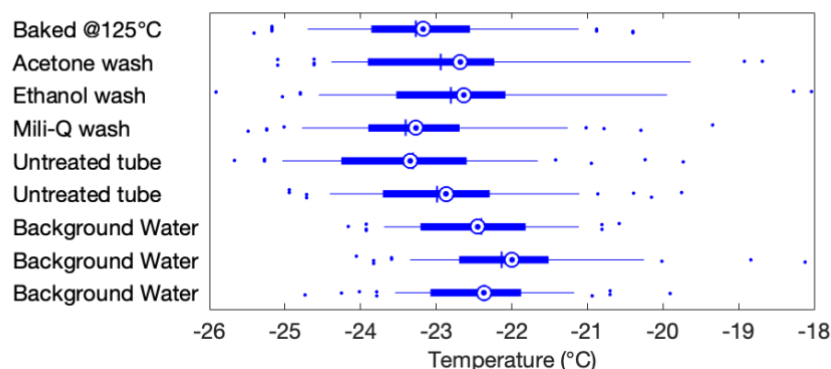

**Figure S1: Comparison of freezing temperature boxplots of molecular biology reagent water (89079-460, Sigma Aldrich, USA) stored (1 day plus freeze/thaw cycle) in Techno Plastic Products tubes after different washing procedures as well as and untreated tubes. The background water refers to water directly from the molecular biology reagent water bottle without any contact with the untreated tube.**

### 4. Immersion freezing experiments with DRINCZ

The DRoplet Ice Nuclei Counter Zurich (DRINCZ) technique used in this study is described in-depth by (David et al., 2019). Briefly, a Microsoft Lifecam HD-3000 camera takes snapshots (every 15 s) of a 96-well non-skirted multi-well tray (VWR, 732-2386) partially submerged in a thermostat-controlled ethanol cooling bath (Lauda Proline RP 845). To ensure that contaminants do not enter the wells of the well plate during the experiment, the plate is covered with a transparent plastic foil (PCR-TS, Axygen by Corning, USA). Mounted above the well plate, the camera monitors the light transmission through the wells supplied by an LED lighting device located at the bottom of the ethanol bath. To obtain the number of frozen wells as a function of temperature, the thermostat cools the ethanol at a rate of  $1\text{ }^{\circ}\text{C min}^{-1}$  until every well is frozen. This cooling rate allows for the freezing to be reported approximately every  $0.25\text{ }^{\circ}\text{C}$  in the range of  $-25\text{ }^{\circ}\text{C}$  to  $0\text{ }^{\circ}\text{C}$ . The number of frozen wells that freeze between pictures can be assigned to the corresponding well temperature, thus, providing the frozen fraction spectrum of the sample. NX-illite as a standard INP material has also been measured on DRINCZ with good agreement against other drop freezing assay setups (Hiranuma et al., 2015).

For analysis with DRINCZ, the snow sample in the polypropylene tube was gently melted in a stirred water bath at room temperature. Then, 5.5 mL of the liquid sample were poured into a 50 mL polystyrene reagent reservoir (89094-680, VWR, USA). Using an 8-channel electronic pipette (1613-0412, VWR, USA), each well of the well plate was filled with  $50 \pm 2\text{ }\mu\text{L}$  of the sample.

## 5. Frozen fraction and INP concentration analysis

DRINCZ yields images of the well plate as a function of temperature. The frozen fraction ( $FF$ ) value is extracted from the images by analysing the change in light intensity of each well. The temperature step with the greatest change in light intensity of a well is assumed to coincide with the sample in that well freezing, and this temperature is referred to as  $T_{frz}$ . The  $FF$  is the ratio between the number of wells frozen at a given temperature ( $n_{frz}(T)$ ) and the total number of wells ( $n_{tot} = 96$ ). An  $FF$  curve as a function of temperature is then derived according to Eq. 1. The frozen fraction rises with decreasing temperatures.

$$FF(T) = \frac{n_{frz}(T)}{n_{tot}} \quad (1)$$

In order to extrapolate the  $FF$  determined by DRINCZ into an INP concentration relevant for atmospheric modelling, Poisson distribution calculations were used (Vali, 1971, 2019). The probability of INPs occurring in a well within the well plate can be expressed as a function of number of INPs per volume of sample in a well (Figure 2 in the main text). For freezing to occur at temperatures above the SA background, the well must contain at least one INP for freezing to occur, and multiple INPs in one well can be represented by a Poisson distribution. These statistics further assume that each INP has identical freezing efficiencies. The total INP concentration  $c[INP]$  is evaluated by summing the INPs of all the wells together and normalizing by the number of wells and the sampled volume (Eq. 2).

$$c[INP] = \frac{\sum INP}{(96 \text{ wells})(50 \times 10^{-3} \text{ mLwell}^{-1})} \quad (2)$$

The INP concentration ( $c[INP]$ ) can be calculated from  $FF$  through Poisson distribution(Vali, 1971, 2019):

$$c[INP] = -\frac{1}{V_d} \ln(1 - dFF) \quad (3)$$

where  $V_d$  is the droplet volume and  $dFF$  is the change in  $FF$ . For example, a  $FF$  of 0.5 corresponds to an INP concentration of 14 INPs mL<sup>-1</sup>.

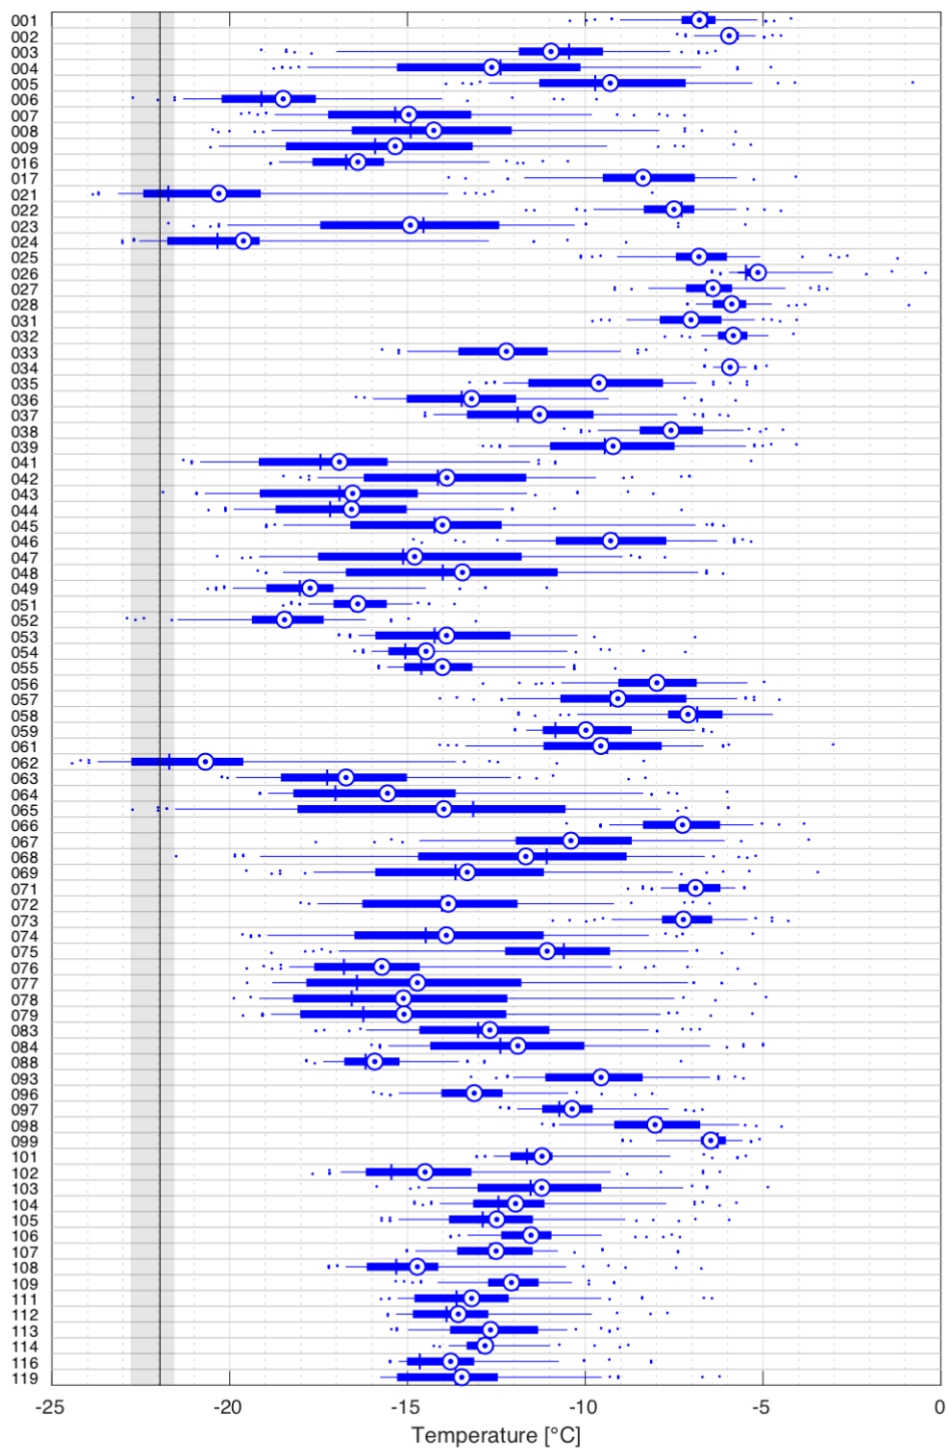



Figure S2 Summary of recorded freezing temperature boxplots of each sample. Boxes show 25-75<sup>th</sup> quantile, whiskers show 5-95<sup>th</sup> quantile, the concentric dot and ring show the mean freezing temperature ( $T_{50}$ ) and the thin vertical blue line represents the median. Outliers are displayed as dots and are randomly scattered vertically to avoid overlapping. The grey shaded area shows the 25-75<sup>th</sup> quantile range of the Sigma Aldrich water background, with its mean as the solid black line.

5

## 6. Size determination

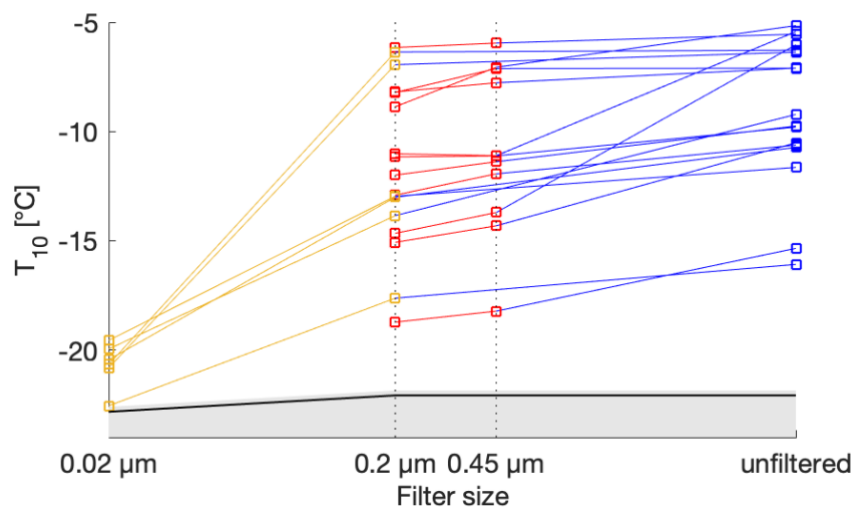

- 10 Figure S3:  $T_{10}$  as a function of filter pore size for selected samples. The  $T_{10}$  values of the background molecular biology reagent water are shown in black. The grey shaded area above the line represents one standard deviation. The samples were filtered through 0.02, 0.20 and 0.45  $\mu\text{m}$  and the lines connect the different filtrates of the same sample. The equivalent figure for  $T_{50}$  values is Figure 5.

## 5

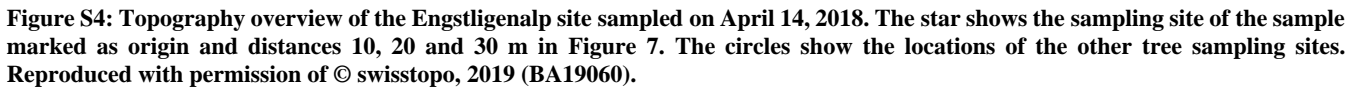

001

004

006

012/017

020-027

031

033

034

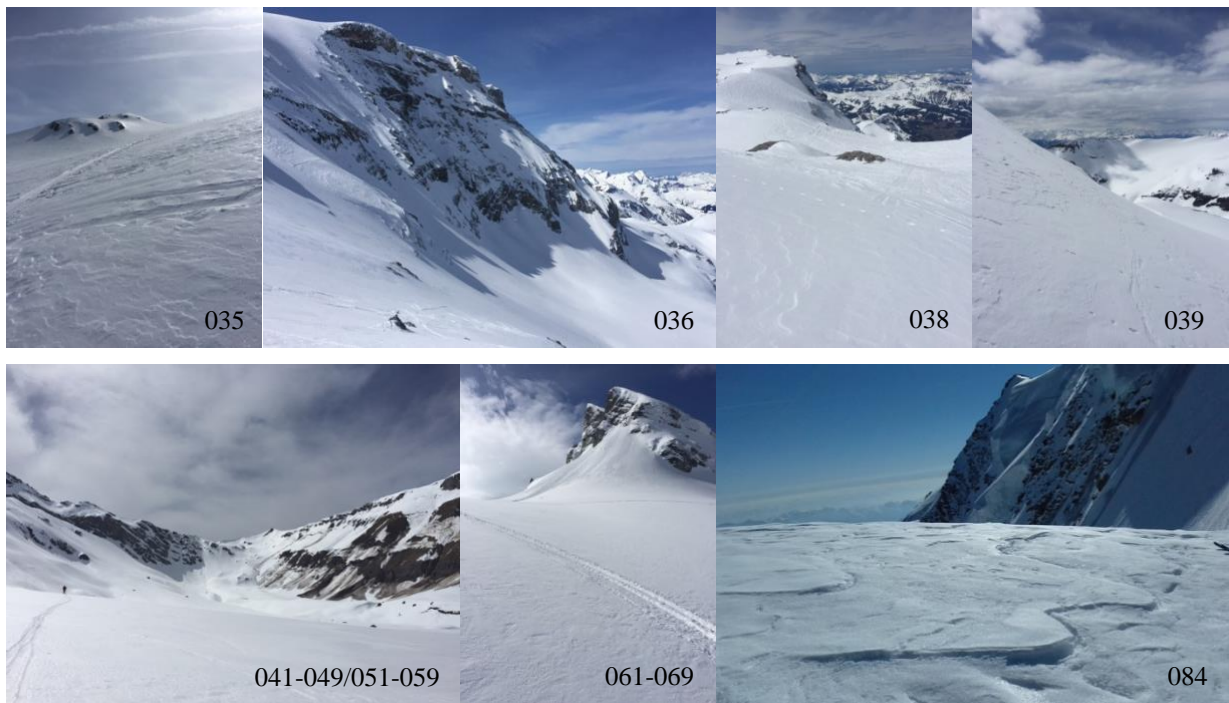

**Figure S5: Selected site images with respective ID numbers.**

## 9. References

- David, R. O., Cascajo Castresana, M., Brennan, K. P., Rösch, M., Els, N., Werz, J., Weichlinger, V., Boynton, L. S., Bogler, S., Borduas-Dedekind, N., Marcolli, C. and Kanji, Z. A.: Development of the DRoplet Ice Nuclei Counter Zürich (DRINCZ): Validation and application to field collected snow samples, *Atmospheric Meas. Tech. Discuss.*, 1–35, doi:<https://doi.org/10.5194/amt-2019-213>, 2019.
- 5 Hiranuma, N., Augustin-Bauditz, S., Bingemer, H., Budke, C., Curtius, J., Danielczok, A., Diehl, K., Dreischmeier, K., Ebert, M., Frank, F., Hoffmann, N., Kandler, K., Kiselev, A., Koop, T., Leisner, T., Möhler, O., Nillius, B., Peckhaus, A., Rose, D., Weinbruch, S., Wex, H., Boose, Y., DeMott, P. J., Hader, J. D., Hill, T. C. J., Kanji, Z. A., Kulkarni, G., Levin, E. J. T., McCluskey, C. S., Murakami, M., Murray, B. J., Niedermeier, D., Petters, M. D., O’Sullivan, D., Saito, A., Schill, G. P., Tajiri, T., Tolbert, M. A., Welti, A., Whale, T. F., Wright, T. P. and Yamashita, K.: A comprehensive laboratory study on the immersion freezing behavior of illite NX particles: a comparison of 17 ice nucleation measurement techniques, *Atmospheric Chem. Phys.*, 15(5), 2489–2518, doi:[10.5194/acp-15-2489-2015](https://doi.org/10.5194/acp-15-2489-2015), 2015.
- 10 Vali, G.: Quantitative evaluation of experimental results an the heterogeneous freezing nucleation of supercooled liquids, *J. Atmospheric Sci.*, 28(3), 402–409, doi:[10.1175/1520-0469](https://doi.org/10.1175/1520-0469), 1971.
- 15 Vali, G.: Revisiting the differential freezing nucleus spectra derived from drop-freezing experiments: methods of calculation, applications, and confidence limits, *Atmospheric Meas. Tech.*, 12(2), 1219–1231, doi:<https://doi.org/10.5194/amt-12-1219-2019>, 2019.
